## 1 Anaerobic Benzene Biodegradation Linked to Growth of Highly Specific Bacterial Clades

2

3 Courtney R. A. Toth<sup>1†</sup>, Fei Luo<sup>1‡</sup>, Nancy Bawa<sup>1</sup>, Jennifer Webb<sup>2</sup>, Shen Guo<sup>1</sup>, and Sandra  
4 Dworatzek<sup>2</sup>, Elizabeth A. Edwards<sup>\*</sup>

5 <sup>1</sup>Department of Chemical Engineering and Applied Chemistry, University of Toronto, 200  
6 College Street, Toronto, ON M5S 3E5, Canada.

7

8 <sup>2</sup>SiREM, 130 Stone Road West, Guelph, ON N1G 3Z2, Canada

9

10 <sup>\*</sup>For correspondence, e-mail: [elizabeth.edwards@utoronto.ca](mailto:elizabeth.edwards@utoronto.ca); Tel. (+1) 416 946 3506; Fax (+1)  
11 416 978 8605.

12

13 <sup>†</sup>Courtney Toth and Fei Luo contributed equally to this work.

14

15 <sup>‡</sup>Current Address: EcoMetrix Incorporated, 6800 Campobello Road, Mississauga, ON L5N 2L8,  
16 Canada

17

### 18 ABSTRACT (150–200-word)

19 Reliance on bioremediation to remove benzene from anoxic environments has proven risky for  
20 decades but for unknown reasons. Years of research have revealed a strong link between anaerobic  
21 benzene biodegradation and the enrichment of highly specific microbes, namely *Thermincola* in  
22 the family Peptococcaceae and the deltaproteobacterial Candidate Sva0485 clade. Using aquifer  
23 material from Canadian Forces Base Borden, we compared five bioremediation approaches in  
24 batch microcosms. Under conditions simulating natural attenuation or sulfate biostimulation,  
25 benzene was not degraded after 1-2 years of incubation and no enrichment of known benzene-  
26 degrading microbes occurred. In contrast, nitrate-amended microcosms reported benzene  
27 biodegradation coincident with significant growth of *Thermincola* spp., along with a functional  
28 gene presumed to catalyze anaerobic benzene carboxylation (*abcA*). Inoculation with 2.5% of a  
29 methanogenic benzene-degrading consortium containing Sva0485 (*Deltaproteobacteria* ORM2)  
30 resulted in benzene biodegradation in the presence of sulfate or under methanogenic conditions.  
31 The presence of other hydrocarbon co-contaminants decreased rates of benzene degradation by a  
32 factor of 2-4. Tracking the abundance of the *abcA* gene and 16S rRNA genes specific for benzene-  
33 degrading *Thermincola* and Sva0485 is recommended to monitor benzene bioremediation in  
34 anoxic groundwater systems to further uncover growth rate limiting conditions for these two  
35 intriguing phylotypes.

36

### 37 KEYWORDS

38 Benzene, BTEX, anaerobic, bioremediation, bioaugmentation, nitrate, methanogenic,  
39 biostimulation

40

41

## 42 SYNOPSIS

43 Anaerobic benzene biodegradation was accelerated by biostimulation with nitrate or by  
44 bioaugmentation under methanogenic or sulfate-reducing conditions.

45 Word count:

46 Total text words: 5172

47 Fig 1 (300) + Fig 2 (600) + Fig 3 (300) + Fig 4 (600) = 1800 word equivalents

48 Total 5172 + 1800 = 6972 < max 7000

49

## 50 1 INTRODUCTION

51 Benzene, toluene, ethylbenzene, and xylenes (BTEX) are widespread contaminants owing to  
52 petroleum spills and releases at industrial facilities, oil refineries, underground storage tanks, or  
53 from pipelines and mining operations. Compared to other hydrocarbons in petroleum, BTEX are  
54 relatively water soluble and can be transported far from the original source leading to extensive  
55 contamination. Cleanup is generally dictated by feasibility and economic viability. For example,  
56 shallow spills can be more easily excavated and/or aerated, and usually rely on aerobic  
57 (bio)remediation processes for complete contaminant destruction.<sup>1</sup> Low permeability groundwater  
58 zones, deep aquifers and sediments, and sites below existing infrastructures often require *in situ*  
59 technologies and thus rely more significantly on anaerobic biodegradation.<sup>2</sup> While the latter has  
60 been an effective remediation approach for toluene and xylenes,<sup>3-7</sup> anaerobic biodegradation of  
61 benzene has been largely unreliable. Only a handful of known field reports have ever demonstrated  
62 convincing evidence of anaerobic benzene bioremediation<sup>3,8,9</sup> despite numerous isotopic analyses  
63 supporting that anaerobic benzene degradation does occur *in situ*.<sup>10-13</sup> This poses a challenge for  
64 site managers, as benzene is often the driver for remediation efforts due to its confirmed  
65 carcinogenicity and lowest allowable concentrations in groundwater ( $\leq 5 \mu\text{g/L}$  in Canada and the  
66 US).<sup>14</sup>

67

68 Anaerobic benzene-degrading microbes identified to-date are mostly uncultured strains and belong  
69 to only a few clades primarily within the Deltaproteobacteria and the Firmicutes (Figure 1). Their  
70 roles in anaerobic benzene oxidation have been gleaned through stable isotope probing<sup>15-17</sup>, using  
71 metagenomic and related approaches<sup>18-22</sup>, enrichment and clone sequencing<sup>23-25</sup>, and growth  
72 studies in the case for isolated strains of *Geobacter*<sup>26</sup>. Phylotypes associated with benzene cluster  
73 with other anaerobic polycyclic aromatic hydrocarbon (PAH) degraders and based on electron  
74 acceptor (Figure 1). Here, we will briefly overview the two most consistently-documented  
75 benzene-degrading clades: the Candidate Sva0485 order of *Deltaproteobacteria* and the genus  
76 *Thermincola* within the *Peptococaceae*.

### 77 1.1 Deltaproteobacterial Candidate Sva0485

78 In studies of methanogenic benzene-degrading enrichment cultures dating back to 1995, our  
79 laboratory postulated that a 16S rRNA gene sequence clone of a deltaproteobacterium referred to  
80 as ORM2 belonged to the benzene degrader in the OR consortium derived from an Oklahoma oil  
81 refinery.<sup>25,27</sup> Further proof came in subsequent studies, where Da Silva and Alvarez<sup>28</sup> inoculated  
82 laboratory aquifer columns with the OR consortium, and used a combination of denaturing  
83 gradient gel electrophoresis and 16S rRNA gene-based quantitative PCR (qPCR) tests to confirm  
84 significant proliferation of *Deltaproteobacteria* ORM2. Growth of ORM2 was always coincident

85 with the establishment of anaerobic benzene biodegradation activity. Similarly, the authors  
86 observed a rapid decrease in *Deltaproteobacteria* ORM2 copies shortly after benzene was  
87 depleted.<sup>28</sup> Later, metagenomic surveys found the existence of two closely related strains of ORM2  
88 (ORM2a and ORM2b) in the OR consortium, both of which were hypothesized to degrade benzene  
89 fermentatively with methanogens and possibly coupled to sulfate reduction.<sup>20, 29</sup> Luo et al.<sup>20</sup>  
90 confirmed the relationship between 16S rRNA gene copy abundance of both *Deltaproteobacteria*  
91 ORM2 strains and benzene biodegradation activity in multiple OR subcultures. Refined 16S rRNA  
92 databases now place ORM2 within the recently proposed Candidate Sva0485 clade (Figure 1).  
93 This clade also includes several other benzene-associated fermenters from different geographical  
94 origins. For example, an ORM2-like strain exists in a second methanogenic benzene-degrading  
95 consortium maintained in our laboratory (Cartwright-CH<sub>4</sub>), that was enriched from a  
96 decommissioned gasoline station in Toronto, Ontario, Canada.<sup>20, 27</sup> Research groups from Japan  
97 have also identified nearly identical 16S rRNA sequences to ORM2 (designated Hasda-A and  
98 SHRah65) in parallel long term benzene enrichment culture studies.<sup>17, 30</sup> Most recently, Qiao et  
99 al.<sup>8</sup> demonstrated convincing field and microcosm evidence that anaerobic benzene bioremediation  
100 at a contaminated industrial site in China was attributed to enrichment of intrinsic Sva0485  
101 Deltaproteobacteria. No member of the Candidate Sva0485 has yet to be isolated, and the  
102 mechanism(s) for benzene activation by these microorganisms is unknown. Interestingly, no  
103 substrate other than benzene has been found to support growth of *Deltaproteobacteria*  
104 ORM2/Candidate Sva0485 organisms in mixed cultures, including benzoate, phenol, or toluene.<sup>31</sup>  
105 <sup>29</sup> This is consistent with the annotations of a complete metagenome-assembled genome of  
106 deltaproteobacterium ORM2a available at JGI/IMG (taxon ID 2795385393).

## 107 **1.2 *Thermincola***

108 Benzene-degrading *Thermincola* species have been enriched under iron-reducing and nitrate-  
109 reducing conditions, and have been retrieved from various materials in Canada, Poland, and the  
110 Netherlands.<sup>15, 16, 25</sup> Ulrich and Edwards<sup>25</sup> first identified identical *Thermincola* 16S rRNA gene  
111 sequence clones in nitrate-reducing benzene-degrading cultures from the aforementioned gasoline  
112 station in Toronto (Cartwright-NO<sub>3</sub><sup>-</sup>, see Figure 1) and from an uncontaminated swamp near Perth,  
113 Ontario, Canada. The role of *Thermincola* in benzene degradation was later supported by Kunapuli  
114 et al.<sup>15</sup> and van der Zaan et al.,<sup>16</sup> who each identified a handful of isotopically-labelled *Thermincola*  
115 16S rRNA gene sequence clones after feeding mixed iron-reducing and nitrate-reducing cultures,  
116 respectively, with <sup>13</sup>C<sub>6</sub>-benzene. Using the enrichment culture BF (Figure 1), Abu Laban et al.<sup>22</sup>  
117 employed metagenomics and differential comparative proteomics analyses to identify a functional  
118 gene (*abcA*) encoded by *Thermincola* predicted to catalyze the direct carboxylation of benzene. A  
119 metatranscriptomic analysis of the Cartwright-NO<sub>3</sub><sup>-</sup> culture (Luo et al, 2014) also supported a role  
120 for carboxylation in benzene activation. Quantitative PCR assays targeting *abcA* have since been  
121 developed by our lab and at least two other research groups,<sup>32-35</sup>. Notably, the *abcA* gene has only  
122 ever been identified in benzene-degrading *Thermincola* species, suggesting this mechanism of  
123 benzene activation may be clade-specific. From metagenome sequencing of the Cartwright-NO<sub>3</sub><sup>-</sup>  
124 culture from our laboratory, a draft genome of *Thermincola* in 27 contigs (JGI/IMG taxon ID  
125 2835707023) has recently been obtained. Most likely, *Thermincola* initiates benzene  
126 biodegradation in a fermentative process and downstream metabolites are further transformed by  
127 several other groups of microbes, primarily denitrifying microbes such as *Aromatoleum* and other  
128 betaproteobacteria. Attempts to grow the benzene-degrading consortium on any substrate other  
129 than benzene have so far only managed to enrich downstream taxa.<sup>31</sup>

### 130 1.3 Implications and Research Objectives

131 If specific microbial clades are responsible for anaerobic benzene attenuation, then strategies to  
132 increase the abundance of these organisms *in situ* must be identified to enhance bioremediation.  
133 Developing specific biomarkers that can reliably monitor the abundance known benzene degraders  
134 is also imperative. Because all predicted fermentative benzene-degrading organisms belong to  
135 Candidate Sva0485 (Figure 1), and because the only catalytic gene available predicted to encode  
136 for anaerobic benzene carboxylase (*abcA*) has been exclusively identified in benzene-degrading  
137 *Thermincola*, we hypothesized that qPCR methods to track the presence and abundance of these  
138 two organisms and the *abcA* gene might provide the specificity needed to infer benzene  
139 biodegradation at contaminated sites.

140  
141 To this end, we compared five bioremediation approaches (natural attenuation, sulfate  
142 biostimulation, nitrate biostimulation, bioaugmentation, and a combination of bioaugmentation  
143 and sulfate) in a series of microcosms constructed with sediments from a petroleum-contaminated  
144 aquifer in Ontario, Canada. This site was selected because previous isotopic and qPCR evidence  
145 suggested intrinsic anaerobic benzene degradation coincident with increases in *abcA* gene copies.<sup>32</sup>  
146 Our primary objective was to identify strategies that could reliably enrich active anaerobic benzene  
147 degraders, either those naturally present in site sediments or artificially inoculated from a defined  
148 methanogenic benzene degrading culture. Since benzene is rarely the sole pollutant at  
149 contaminated sites, a second objective was to explore the impact of related co-contaminants  
150 (toluene, ethylbenzene, *o*-xylene, *m*-xylene and naphthalene) on anaerobic benzene degradation.  
151 Our results show that intrinsic benzene-degrading *Thermincola* could be enriched only in the  
152 presence of nitrate, and that bioaugmentation (with the OR consortium containing  
153 *Deltaproteobacterium* ORM2) stimulated benzene removal under methanogenic and sulfate-  
154 reducing conditions. The presence of co-contaminants (TEX and naphthalene) led to longer  
155 removal timeframes in these microcosm studies.

156

## 157 2 MATERIALS AND METHODS

### 158 2.1 Description of the Methanogenic Benzene-Degrading Culture DGG-B

159 The oil refinery (OR) consortium was established in 1995 from hydrocarbon-contaminated soil  
160 and groundwater samples collected at an oil refinery site in Oklahoma, USA.<sup>25, 27</sup> For  
161 approximately 20 years, subcultures of the parent microcosms were maintained as described  
162 elsewhere<sup>20, 25</sup> and repeatedly fed benzene (130 – 1,100  $\mu$ M) as their sole carbon and energy source.  
163 A schematic of the subculturing history of the OR consortium is available in Luo et al.<sup>20</sup> In 2016,  
164 one active subculture (OR-b1Ar) was transported to SiREM labs (Guelph, ON) for scale-up to  
165 produce commercial volumes (>100L), which we now refer to as the DGG-B lineage, named in  
166 honour of anaerobic hydrocarbon biodegradation pioneer, Dunja Grbić-Galić. In DGG-B culture  
167 vessels, rates of benzene degradation have averaged 1.4 – 25  $\mu$ M/day.

### 168 2.2 Sample Location and Collection

169 Groundwater aquifer sediments were collected in September 2016 from a shallow, petroleum  
170 hydrocarbon-contaminated aquifer at the Canadian Forces Base (CFB) Borden in Ontario, Canada.  
171 The site is managed in part by the University of Waterloo, where it is used for field experimentation

172 of groundwater remediation technologies.<sup>32, 36</sup> The water table is located 1.0 meter below surface  
173 (mbs), varying seasonally, and contains background concentrations of total iron (25 – 30 mg/L)  
174 and sulfate (10 to 30 mg/L) supplied from a nearby historical leachate plume.<sup>37, 38</sup> At the time of  
175 sampling, groundwater concentrations of benzene, toluene and xylenes ranged between 200 – 960  
176 µg/L. Sediment cores were retrieved from a depth of 1.5 – 3.0 mbs, encased in plastic tubing, and  
177 capped to minimize sediment exposure to oxygen. The extracted sediments were homogenous in  
178 appearance and composed primarily of fine to medium grain sand. All samples were immediately  
179 shipped to SiREM (Guelph, ON) and stored at 4 °C until use.

### 180 **2.3 Experimental Setup**

181 In a disposable glove bag (Atmosbag, Sigma-Aldrich), homogenized CFB Borden sediments were  
182 distributed (60 g) into 250-mL glass screw-cap bottles, followed by 150 mL of anaerobic artificial  
183 groundwater.<sup>39</sup> Resazurin was also added to one bottle per experimental treatment (described  
184 below) as a redox indicator. Bottles were sealed with Teflon Mininert® valve screw caps and stored  
185 in an anaerobic glove box (headspace supplied with 10% H<sub>2</sub>, 10% CO<sub>2</sub>, 80% N<sub>2</sub>) for two weeks  
186 prior to any further amendments to ensure anaerobicity.

187 On Day 0 of the experiment, prepared microcosms were amended with electron acceptors and/or  
188 electron donors, as detailed in Table S1. Three to four bottles were established per experimental  
189 treatment, for a total of 38 microcosms. Microcosms were named numerically and include the  
190 abbreviation BOR in reference to CFB Borden. On Day 7, select microcosms were bioaugmented  
191 with 3.75 mL (2.5% v/v) of DGG-B culture. Microcosms were incubated for up to 645 days and  
192 were sampled approximately every four weeks as outlined below. Specific bottles were re-  
193 amended with respective electron donor(s) and/or electron acceptor when depleted.

### 194 **2.4 Analytical Methods**

195 Methane, BTEX, and naphthalene dissolved in the aqueous phase of the microcosms were  
196 routinely measured using an Agilent 7890 gas chromatograph (GC) equipped with an Agilent  
197 G1888 headspace autosampler, described in detail in Supporting Information (SI). Anion (nitrate,  
198 nitrite, sulfate, acetate equivalents, chloride, and phosphate) analysis was performed on a Thermo-  
199 Fisher ICS-2100 ion chromatograph (IC) equipped with a Thermo-Fisher AS-DV autosampler and  
200 an AS18 column (SI Text S2). Iron reduction was not monitored in this study. Raw data are  
201 reported in Table S2.

### 202 **2.5 DNA extractions and analyses**

203 Microcosms were sampled regularly for subsequent genomic DNA (gDNA) extraction and  
204 analysis to monitor growth of known anaerobic benzene degraders and microbial community  
205 composition. Briefly, solid and liquid slurries (1 mL) from well-shaken microcosms were  
206 centrifuged for 5 min at 13,000 × g and their supernatants discarded. The resulting pellets were  
207 frozen (-80 °C) and genomic DNA (gDNA) extracted using the KingFisher™ Duo Prime  
208 Purification System (Thermo Scientific).

209 All gDNA samples were assayed by qPCR using universal 16S rRNA gene primer sets for Bacteria  
210 and Archaea, as well as specific primers for Sva0485 clade Deltaproteobacteria (including ORM2)  
211 and benzene-degrading *Thermincola* (Table S3). We also tracked the predicted anaerobic benzene-  
212 carboxylase gene *abcA* (Table S3). Reaction efficiencies for all primer sets ranged between 87 and  
213 105% and calibration curve R<sup>2</sup> values were > 0.995 (Figure S1). The specificity of the ORM2 and

214 *Thermincola* primer pairs against sequences of known/predicted benzene and PAH-degrading  
215 bacteria is indicated in Figure 1. qPCR reaction and thermocycling conditions are available in SI  
216 (Text S3). Quantification limits for qPCR were approximately  $10^3$  copies per mL of microcosm  
217 slurry.

218 The relative abundance of other microbes in each sample was determined using 16S rRNA gene  
219 amplicon sequencing using primers targeting the V6-V8 region. Details are provided in SI (Text  
220 S4). Raw sequence reads were deposited to the National Center for Biotechnology Information  
221 Short Read Archive (SRA) under BioProject PRJNA661350. No 16S rRNA gene amplicons were  
222 recovered from sterile poisoned control bottles at any timepoint.

### 223 3 RESULTS AND DISCUSSION

#### 224 3.1 Anaerobic benzene biotransformation and microbial abundances by treatment

225 Thirty-eight (38) anoxic microcosms containing CFB Borden (BOR) sediments were established.  
226 At the start of the experiment (Day 0), all microcosms initially contained small amounts of nitrate  
227 ( $0.8 \pm 2.0$   $\mu\text{mol/bottle}$ ), sulfate ( $23 \pm 2.0$   $\mu\text{mol/bottle}$ ) and methane ( $8.0 \pm 0.2$   $\mu\text{mol/bottle}$ ) from  
228 site sediments (Table S2). Deltaproteobacterial Candidate Sva0485 16S rRNA genes ( $< 10^3$   
229 copies/mL) and *Thermincola* 16S rRNA genes ( $\leq 10^4$  copies/mL) detected by qPCR in the gDNA  
230 extracted on Day 0 were at or just above detection limits, suggesting that very low numbers of  
231 intrinsic anaerobic benzene degraders in BOR sediments, in agreement with previous field  
232 reports.<sup>32</sup>

233 Following addition of hydrocarbon electron donors, electron acceptors, and inoculation with DGG-  
234 B culture as per Table S1, concentrations were monitored over time. The main trends observed for  
235 each treatment are also summarized in Table S1; all experimental raw data are provided in Table  
236 S2. Benzene was not depleted in mercuric chloride-poisoned sterile controls (Figure S2a). Benzene  
237 was also not degraded in untreated (BOR05-07; Figures 2a) or 2 mM sulfate-amended microcosms  
238 (BOR08-10; Figure 2b), despite active methanogenesis or sulfate reduction in these bottles. Based  
239 on qPCR analyses, intrinsic Sva0485, *Thermincola* and *abcA* gene copies did not increase above  
240 quantifiable limits in either set of treatments (Figures 2a and 2b; bottom panel). Even after 645  
241 days, no convincing evidence of benzene depletion was observed (Figures S2b and c). Given the  
242 overall lack of benzene degradation, no additional molecular timepoints were collected in these  
243 bottles after Day 109.

244 Benzene was degraded in two out of three microcosms amended with 2 mM nitrate (BOR11 and  
245 BOR12 but not BOR13) within 312 days of incubation (Figures 2c and S3). Benzene depletion in  
246 the most active replicate (BOR11) was first observed after  $\sim 95$  days at an initial rate of 1.8  
247  $\mu\text{M/day}$ , which increased to 4.1  $\mu\text{M/day}$  after re-amending benzene twice (Figure 2c). While  
248 nitrate reduction was observed throughout the incubation, near-stoichiometric amounts of nitrite  
249 were produced solely during periods of active benzene biodegradation, characteristic of  
250 incomplete nitrate reduction.<sup>40</sup> Active bottles were refed nitrate once (Day 146) before clear  
251 evidence of benzene biodegradation and nitrite accumulation was observed. In benzene-degrading  
252 bottles, *abcA* gene copies increased by 3 to 4 orders of magnitude between Days 12 and 179  
253 (Figures 2c and S3). Increases in *abcA* always coincided with the first observation of benzene loss,  
254 and *abcA* gene concentrations of at least  $10^5$  copies/mL appeared to be required before benzene loss  
255 was measurable. This is best seen in BOR12 (Figure S3). This bottle, which exhibited a longer lag  
256 period than BOR11, had fewer *abcA* gene copies by Day 109 ( $1.1 \times 10^4$  copies/mL). In BOR13,

257 where no benzene degradation activity was observed, no quantifiable amounts of *abcA* were ever  
258 detected (Figure S3). Since all known organisms that harbour an *abcA* gene belong to  
259 *Thermincola*,<sup>15, 16, 21, 33</sup> gDNA samples were also screened for members of this genus. Expectedly,  
260 significant increases of *Thermincola* qPCR targets were observed in parallel with *abcA* and in  
261 similar amounts (Figures 2c and S3). The *Thermincola* qPCR primers do not exclusively capture  
262 benzene-degrading strains (see Table S3), which may explain why *Thermincola* was detected in  
263 BOR13 on Day 12 (Figure S3).

264 Benzene was degraded within ~ 34 days in all bottles bioaugmented with the methanogenic  
265 consortium DGG-B (Figure 2d). The inoculum contained approximately  $1.7 \times 10^8$  copies/mL of  
266 deltaproteobacterial Candidate Sva0485 organisms (ORM2). We recovered  $1.5 \times 10^6$  copies/mL  
267 of ORM2 in bottles post-bioaugmentation which is ~ 1% of the inoculum, within qPCR error of  
268 the 2.5% inoculum added. ORM2 gene copies increased by one order of magnitude by Day 109,  
269 supporting microbial growth post-bioaugmentation. Concentrations of archaea also increased  
270 proportionally with ORM2 (Figure 2d) and electron balance calculations confirmed that benzene  
271 oxidation was coupled to methanogenesis (Table S4). Methanogenic benzene biodegradation was  
272 also supported by the results of 16S rRNA gene amplicon sequencing (detailed below). Initial ( $2.0$   
273  $\pm 0.3$   $\mu\text{M}/\text{day}$ ) and maximum ( $6.5 \pm 0.3$   $\mu\text{M}/\text{day}$ ) benzene biodegradation rates in BOR14-16 were  
274 comparable to rates reported under nitrate-reducing conditions (Table S1, Figure 2d), but benzene  
275 depletion was achieved more than 70 days sooner in bioaugmented bottles as a result of shorter  
276 lag times.

277 The addition of 2 mM sulfate to bioaugmented bottles (BOR17-19) resulted in no significant  
278 differences in benzene lag times, degradation rates, or enrichment of deltaproteobacterium ORM2  
279 relative to bioaugmentation only (Table S1, Figure S4). Electron balances link benzene oxidation  
280 primarily to methanogenesis, although some benzene oxidation appears to have been linked to  
281 sulfate reduction (Table S4). Electron balance calculations revealed an unknown source of electron  
282 acceptor demand from the BOR soil that was more abundant than the hydrocarbons added, which  
283 confounded electron balances in some cases. Given that all benzene-degrading members of  
284 Sva0485 have been characterized as fermentative organisms (Figure 1),<sup>17, 20, 30</sup> sulfate may not  
285 enhance benzene degradation by members of this candidate clade. Microbial community  
286 sequencing (described later) offered additional clues as to the microorganisms and metabolisms  
287 driving benzene biodegradation in these bottles.

### 288 3.2 Effect of Hydrocarbon Co-Contaminants on Anaerobic Benzene Bioremediation

289 We next explored the impact of TEX and naphthalene on benzene biodegradation (bottles BOR20-  
290 38). We observed variable patterns of BTEX degradation and lag times among replicates and  
291 treatments, although naphthalene was recalcitrant in all cases (Figures S5–S10). Toluene was the  
292 only hydrocarbon degraded in untreated bottles (BOR24-26), although degradation stalled in 2 out  
293 of 3 replicates after sulfate was depleted (Figure S6). The addition of 2 mM sulfate (BOR27-29)  
294 enhanced the biodegradation of toluene, *o*- and *m*-xylene (Figure S7), whereas 2 mM nitrate  
295 (BOR30-32) stimulated complete BTEX degradation in two out of three microcosms (Figure S8),  
296 and degradation proceeded in the following order: toluene > *m*-xylene > ethylbenzene > *o*-xylene  
297 > benzene. Perhaps as a result of being degraded last, benzene lag times increased from 95-160  
298 days (in BOR11-12) to 170-260 days in BOR31-32 (Table S1). Initial rates in BOR31-32 were 17-  
299 72% slower than rates reported for BOR11.

300 In DGG-B bioaugmented bottles (BOR33-35), toluene, benzene and *o*-xylene were degraded in  
301 roughly the same period of  $\sim 160$  days (Figure S9). Looking more closely, it is apparent that  
302 toluene degradation was initiated quickly depleting the available sulfate, stopped when sulfate was  
303 depleted, and resumed when methanogenic conditions became established. In the bioaugmented  
304 bottles BOR36-38 that received additional sulfate, toluene was degraded much more rapidly ( $<40$   
305 days), as were *o*- and *m*-xylene, while benzene degradation began after a similar lag as BOR33-35  
306 (Table S1, Figure S10). Initial rates of benzene degradation were slower than in benzene-only  
307 bottles. We re-amended BTEX and naphthalene to sulfate-amended bottles BOR37 and BOR38  
308 on Day 146 and found that benzene degradation rates increased from  $\sim 0.6$   $\mu\text{M}/\text{day}$  to  $\sim 1.4$   $\mu\text{M}/\text{day}$   
309 (Figure S10), still slower than initial rates reported for BOR14-19. We refed BOR38 a third time  
310 with benzene only and this time degradation rates increased up to  $4.8$   $\mu\text{M}/\text{day}$  (Figure S10). In  
311 bottles BOR36-38, electron balance calculations revealed that benzene degradation became  
312 coupled to sulfate reduction, as much more benzene was consumed than could be explained by  
313 observed methane production (Table S5). Ethylbenzene and naphthalene were not degraded in  
314 these treatments.

### 315 3.3 Rates of Anaerobic Benzene Biodegradation and Microbial Growth Estimates

316 We next examined the relationship between rates of benzene degradation and the abundance  
317 *abcA/Thermincola* and Sva0485 clade Deltaproteobacteria as measured by qPCR. An estimate of  
318 the zero order rate of benzene degradation ( $\mu\text{moles per L}/\text{day}$ ) was calculated for each time interval  
319 where corresponding qPCR data was also available. A good correlation between benzene  
320 degradation rate and microbial abundance was observed above a threshold between  $10^4$  or  $10^5$   
321 cells/mL for both targets (Figure 3). Below this threshold, benzene degradation was very slow or  
322 not detected. In the presence of TEX and naphthalene, *abcA* and ORM2 copies/mL increased less  
323 than in bottles containing benzene only, and corresponding rates of anaerobic benzene  
324 biodegradation were proportionally slower (Figure 3). Extrapolating a linear regression from both  
325 datasets, we calculated estimates of the concentration of *abcA* ( $3.8 \times 10^5$  copies/mL) and ORM2  
326 ( $4.3 \times 10^6$  copies/mL) required to achieve a rate of  $0.1$   $\mu\text{M}$  benzene/day ( $\sim 8$   $\mu\text{g}/\text{L}/\text{day}$ ). From  
327 these data, about an order of magnitude fewer *abcA*-containing organisms are required compared  
328 to ORM2. Overall, these data suggested that benzene biodegradation was partially impeded by the  
329 hydrocarbon co-contaminants themselves or as a result of their degradation, leading to slower  
330 benzene removal and lower abundance of benzene-degrading microbes.

331 We used qPCR and concentration data to estimate doubling times and specific yields (Table S5).  
332 Although the data are relatively sparse, the fastest doubling times were observed under nitrate-  
333 reducing conditions ( $10 \pm 2$  days;  $n=6$ ). Yields were estimated at  $7 \pm 2 \times 10^3$  copies *abcA*/nmol  
334 benzene. In bottles bioaugmented with DGG-B, doubling times were  $20 \pm 2$  days ( $n=8$ ) in bottles  
335 containing benzene only. In bottles with BTEX and naphthalene, doubling times for ORM2 were  
336 longer and more variable ( $50 \pm 10$  days;  $n=6$ ). Yield estimates for ORM2 were similar regardless  
337 of treatment at about  $3 \pm 1 \times 10^5$  copies ORM2/nmol benzene. ORM2 cell are smaller than  
338 *Thermincola* cells, and when mass per cell is taken into account, yields are not so dissimilar ( $\sim 0.05$   
339 to  $0.07$  g cells per g benzene; Table S6). These doubling times are remarkably consistent with  
340 reported doubling times of 9 days (nitrate-reducing) and 30 days (methanogenic) reported as far  
341 back as 2003.<sup>25</sup> Luo *et al.*<sup>20</sup> reported doubling times for the OR consortium in 2016 of 34 days and  
342 a yield for ORM2 of about 0.01-0.02 cells/g benzene. These yields are very low.



### 343 3.4 Microbial Community Analysis

344 Eighty-six (86) gDNA samples from active microcosms were analyzed by 16S rRNA gene  
345 amplicon sequencing, including the original BOR sediments and the DGG-B inoculum. Table S7  
346 provides results for amplicon sequence variants (ASVs) with greater than 0.1% relative abundance  
347 in at least one sample. Non metric multidimensional scaling (NMDS) ordination identified three  
348 clusters based on bioremediation treatment (Figure S11). Communities enriched in untreated and  
349 sulfate-amended bottles were comparable to each other, and were most closely related to original  
350 BOR sediments. All bioaugmentation bottles clustered together, and were more similar to the  
351 DGG-B inoculum. Nitrate biostimulation enriched for distinct communities. Microbial  
352 communities from bottles amended with mixed hydrocarbons did not cluster distinctly from their  
353 counterparts amended with benzene only (Figure S11).

354 A heatmap comparing the microbial communities in all bottles after 109-258 days of incubation  
355 (Figure 4) recapitulates the three main clusters seen in Figure S11. The first cluster regroups  
356 untreated and sulfate amended bottles, as well as the original Borden sediments. The latter were  
357 predominantly comprised of Betaproteobacteria (68.8%, collectively), including *Hydrogenophaga*  
358 and unclassified *Burkholderiaceae*. Sulfate-amended treatments became enriched in  
359 Deltaproteobacteria, in particular *Geobacter* (3.35 – 14.4%) and *Desulfovibrio* (0.83 – 24.7%).  
360 Benzene degradation was not observed in any of these bottles. We did detect enrichment of a  
361 sequence variant (*Geobacter* ASV3) with 97.4% sequence identity to *Geobacter metallireducens*  
362 strain Ben, an iron-reducing isolate previously shown to degrade benzene,<sup>26, 41</sup> but no other  
363 predicted anaerobic hydrocarbon degraders were identified. Dominant ASVs enriched in the  
364 presence of BTEX and naphthalene were comparable to those enriched on benzene alone (Figure  
365 4).

366 The second cluster regroups all nitrate-amended bottles and one bottle (BOR08) amended with  
367 sulfate that exhibited much less sulfate reduction compared to other bottles of the set (Table S4).  
368 Twelve unique ASVs belonging to *Thermincola* ASVs were identified across our dataset, but four  
369 (designated as *Thermincola* ASV1-4) were enriched (up to 8.8% of reads) solely in active nitrate-  
370 reducing, benzene-degrading replicates (BOR11-12 and BOR 30-32; Table S7, Figures 4 and  
371 S12a). The relative abundance of these four *Thermincola* ASVs was nearly identical across all  
372 samples, suggesting they all belong to the same organism and genome. *Thermincola* ASV1-4  
373 shared 97.4 – 99.2% identity to sequences obtained from benzene degrading nitrate-reducing  
374 enrichment cultures in our lab (Figure S13).<sup>21, 34, 35</sup> The four ASVs also shared high sequence  
375 identity (94.7 – 98.3%) to several other *Thermincola* species highlighted in Figure 1. Given that  
376 the enrichment of *Thermincola* 16S rRNA gene copies coincided with that of *abcA*, and that  
377 expression of *abcA* has previously been demonstrated at CFB Borden,<sup>32</sup> we propose that  
378 *Thermincola* is likely a key anaerobic benzene degrader at this field site. Another ASV that was  
379 enriched solely in active nitrate-reducing microcosms belonged to Patescibacteria candidate  
380 division WWE3 (Table S7, Figures 4 and S12a). Members of the Patescibacteria superphylum  
381 (referred to as the Candidate Phyla Radiation, or CPR) have been identified in benzene-degrading  
382 communities, and are also prevalent in groundwater, sediment, lake, and other aquifer  
383 environments.<sup>42</sup> They have tiny genomes and exhibit fermentative communal lifestyles.<sup>43</sup> Our data  
384 hints that benzene-contaminated groundwater may enrich for select members of this expansive  
385 phylogenetic group of candidate organisms.

386 The third cluster includes all DGG-B bioaugmented microcosms (BOR14-19, BOR33-38), where  
387 a limited core of ~ 11 ASV were enriched by Day 109 (up to 79.1% of reads), all of which likely  
388 originated from the inoculum (Table S7, Figures 4 and S12b). Two sequence variants affiliated  
389 with Sva0485 clade *Deltaproteobacteria* (ORM2) and an ASV associated with *Candidatus*  
390 *Yanofskybacteria* (previously referred to as *Parcubacterium*/OD1) were the most abundant  
391 bacteria. High abundances of *Ca. Yanofskybacteria* have previously been reported in the OR  
392 consortium (now DGG-B), although its specific community role is not understood.<sup>20</sup>  
393 Methanogenic archaea belonging to *Methanoregula* (2 ASVs) and *Methanosaeta* (3 ASVs) all  
394 increased in relative and absolute abundances over time (Figure S12b), agreeing with qPCR trends  
395 reported in this study and in previous studies.<sup>20</sup> *Deltaproteobacteria* Sva0485 ASV2 is 100%  
396 identical to both *deltaproteobacterium* ORM2a and ORM2b reported previously,<sup>20</sup> whereas  
397 Sva0485 ASV1 differed by a single nucleotide position (Figure S14). The significance of this  
398 second sequence variant (different strain, mutation or error) is not clear at this time. Its high  
399 sequence abundance and presence in all bioaugmented samples supports that Sva0485 ASV1 is  
400 not a sequencing artifact. We also observed growth of *Spirochaetaceae* (Table S6, Figures 4 and  
401 S12b), a family previously hypothesized to participate in recycling of dead biomass in anaerobic  
402 hydrocarbon-degrading communities.<sup>44</sup> Other major organisms in the third cluster include  
403 *Micrarchaeaia* and an unclassified *Thermoplasmata* not previously detected in the DGG-B  
404 inoculum. These are archaeal clades whose poorly characterized members also have tiny genomes  
405 that have eluded recognition in the past. In this study, *Micrarchaeaia* were more enriched in sulfate-  
406 amended bottles (Figure 4). *Desulfovibrio* ASV2 was also enriched in sulfate-amended bottles,  
407 particularly those amended with the suite of BTEX hydrocarbons (BOR36-38). This ASV did not  
408 cluster with others from the DGG-B inoculum, however, so it may have originated from the  
409 sediment.

410 Reconciling the microbial community profile with qPCR data, benzene biodegradation rates and  
411 electron balance data, we see tremendous concordance. While electron acceptors drove differences  
412 in the microbial communities more so than electron donors, we clearly see proliferation of specific  
413 benzene degrading organisms only where benzene degradation was observed. Organisms that  
414 proliferate in concert with predicted benzene degraders provide clues to essential syntrophic  
415 partners. In *Thermincola* cluster 2 (Figure 4), we see enrichment of *Bulkholderiaceae* and  
416 *Sulfuritalea*; both implicated in degradation of aromatics such as benzoate with nitrate as electron  
417 acceptor.<sup>45</sup> *Ferribacterium* from the family of Rhodocyclaceae also became enriched in Cluster 2  
418 particularly in the oddball bottle BOR08. Although not measured, it might have reduced iron in  
419 the BOR sediments coupled to oxidation of hydrogen or organic acids, explaining lower sulfate  
420 reduction for this bottle. Interestingly, other benzene-degrading *Thermincola* have been  
421 characterized from iron-reducing cultures. In cluster 3 (Figure 4), proliferation of a narrow group  
422 of microbes surrounding Sva0485 clade *Deltaproteobacteria* (ORM2) was evident, and perhaps  
423 the tight association, particularly with *Candidatus Yanofskybacteria* and *Methanosaeta* was  
424 disrupted by other hydrocarbon degraders when TEX and naphthalene were added to the bottles  
425 in addition to benzene.

## 426 5 Perspectives for the Field

427 Nitrate addition was found to stimulate benzene degradation and growth of *abcA*-containing  
428 *Thermincola* as well as degradation of TEX co-contaminants (Figure S8), although replicates were  
429 not consistent. Several *in situ* studies have also reported successful BTEX attenuation using nitrate  
430 amendment,<sup>3, 4, 46</sup> thus nitrate biostimulation does appear to offer site managers an option for field

431 remediation. Nitrate and nitrite are themselves regulated groundwater contaminants and repeated  
432 nitrate amendment will be necessary to sustain activity, as was the case in our tests (Figures 2c,  
433 S3 and S8). Thus, nitrate addition may not be a practical or cost-effective solution for all sites.

434 Bioaugmentation with methanogenic consortium DGG-B resulted in growth of the entire benzene-  
435 degrading community and sustained biodegradation (Figures 2d, 4, S4, S9, S10 and S12b).  
436 Bioaugmentation is not thought to be needed for hydrocarbons because these substrates occur  
437 naturally and indigenous degraders are thought to be ubiquitous in nature.<sup>47, 48</sup> Moreover, many  
438 sites already have ample sources of anaerobic electron acceptors (nitrate, sulfate, and/or CO<sub>2</sub>) that  
439 should support benzene-degrading communities. This begs the question why do intrinsic benzene-  
440 degrading organisms fail to become enriched in anaerobic environments? Especially since  
441 microbes that metabolize toluene and xylenes anaerobically proliferate far more commonly?

442 One hypothesis is that growth of anaerobic benzene degrading organisms is inhibited by the  
443 presence of other hydrocarbons.<sup>3, 49, 50</sup> Such a hypothesis is somewhat consistent with the data from  
444 this study (Figures 3, S8-S10). Average rates of anaerobic benzene degradation decreased in  
445 bottles containing co-contaminants. Although inhibition due to toxicity is one explanation,<sup>51, 52</sup> it  
446 is unlikely since background methanogenesis and sulfate reduction were not impacted.  
447 Competition for essential nutrients or co-factors, predation by other organisms, cross-feeding,  
448 leaky pathways, and high decay rates are among many other more likely explanations. Given the  
449 co-enrichment of a narrow group of 11 ASVs in cluster 3 (Figure 4), it seems that there are very  
450 significant co-dependencies between the key benzene-degraders, members of the CPR and specific  
451 methanogens. Further experimentation is required to narrow down these possibilities.

452 It is now clear that microorganisms responsible for anaerobic benzene transformation are highly  
453 specialized, occupying a tiny single-substrate niche, akin to how certain *Dehalococcoides* are  
454 uniquely adapted to only a few chlorinated substrates.<sup>53</sup> We have been unable to identify any other  
455 substrate other than benzene for *Thermincola* nor for Sva0485 clade Deltaproteobacteria, and none  
456 of the genes in their genomes provide further hints. Amending an intermediate compound like  
457 benzoate simply enriches for other organisms in the community and thus does not promote their  
458 growth.<sup>21, 31</sup> Bioaugmentation with specialized anaerobic dechlorinating bacteria at sites  
459 contaminated with chlorinated solvents has shown tremendous success for over 20 years as  
460 reviewed in Stroo *et al.*<sup>54</sup> Perhaps we could tackle benzene in anoxic environments in a similar  
461 way. To this end, we are evaluating DGG-B bioaugmentation in an increasing number of  
462 laboratory microcosms and to date have initiated three bioaugmentation field pilots. Though it  
463 remains unclear why intrinsic anaerobic benzene degraders rarely proliferate *in situ*, we are  
464 encouraged to determine if bioaugmentation to boost microbial community abundance could be  
465 effective for BTEX cleanup in anoxic environments.

## 466 6 AUTHOR CONTRIBUTION

467 EE, FL and SD contributed to the conception of this research project. DGG-B culture maintenance  
468 was overseen by all authors. FL, JW and NB established, maintained and sampled all microcosms  
469 during treatability testing. Molecular sampling and testing was conducted by CT, FL, SG and NB.  
470 CT processed and interpreted all molecular results and drew figures. CT and EE wrote the  
471 manuscript.

## 472 7 ASSOCIATED CONTENT

473 The Supporting Information is available free of charge of the ACS Publications website.  
474 Supporting Information includes detailed description of analytical methods, and DNA extraction  
475 and associated PCR and amplicon analyses (PDF). The Supporting information PDF file also  
476 includes 14 supplemental figures showing various plots of concentration data over time for each  
477 treatment, as well as qPCR calibration data and sequence alignments. A supplementary excel file  
478 includes all Tables (S1-S7) providing experimental design, raw and transformed data, electron  
479 balances, yield and doubling time calculations, and a table of amplicon sequence data.

## 480 8 ACKNOWLEDGEMENTS

481 This study was funded by a Genomic Application Partnership Program (GAPP) grant awarded to  
482 Elizabeth Edwards and Sandra Dworatzek (Project ID OGI-102), which was supported by Genome  
483 Canada, Genome Ontario, the Government of Ontario, Mitacs Canada, SiREM and Federated Co-  
484 Operatives Limited. Additional financial support was provided through a Natural Sciences and  
485 Engineering Research Council (NSERC) Discovery grant awarded to EE. The authors gratefully  
486 thank the laboratory of Dr. Neil Thomson (University of Waterloo) for field sample collection,  
487 and Dr. Camilla Nesbø (University of Alberta) for assistance with Illumina sequencing analysis.

## 488 9 REFERENCES

- 489 1. Ossai, I. C.; Ahmed, A.; Hassan, A.; Hamid, F. S., Remediation of soil and water  
490 contaminated with petroleum hydrocarbon: A review. *Environmental Technology &*  
491 *Innovation* **2020**, *17*.
- 492 2. Farhadian, M.; Vachelard, C.; Duchez, D.; Larroche, C., In situ bioremediation of  
493 monoaromatic pollutants in groundwater: a review. *Bioresour Technol* **2008**, *99*, (13),  
494 5296-308.
- 495 3. Cunningham, J. A.; Rahme, H.; Hopkins, G. D.; Lebron, C.; Reinhard, M., Enhanced In  
496 Situ Bioremediation of BTEX-Contaminated Groundwater by Combined Injection of  
497 Nitrate and Sulfate. *Environ Sci Technol* **2001**, *35*, 1663-1670.
- 498 4. Reinhard, M.; Shang, S.; Kitanidis, P. K.; Orwin, E.; Hopkins, G. D.; Lebron, C. A., In situ  
499 BTEX biotransformation under enhanced nitrate- and sulfate-reducing conditions. *Environ*  
500 *Sci Technol* **1997**, *31*, 28-36.
- 501 5. Gieg, L. M.; Kolhatkar, R.; McInerney, M. J.; Tanner, R. S.; Harris, H. M.; Sublette, K. L.;  
502 Suflita, J. M., Intrinsic bioremediation of petroleum hydrocarbons in a gas condensate-  
503 contaminated aquifer. *Environ Sci Technol* **1999**, *33*, 2550-2560.
- 504 6. Beller, H. R.; Ding, W.-H.; Reinhard, M., Byproducts of anaerobic alkylbenzene  
505 metabolism useful as indicators of in situ bioremediation. *Environ Sci Technol* **1995**, *29*,  
506 2864-2870.
- 507 7. Schreiber, M. E.; Bahr, J. M., Nitrate-enhanced bioremediation of BTEX-contaminated  
508 groundwater: parameter estimated from natural-gradient tracer experiments. *J Contam*  
509 *Hydrol* **2002**, *55*, 29-56.
- 510 8. Qiao, W.; Luo, F.; Lomheim, L.; Mack, E. E.; Ye, S.; Wu, J.; Edwards, E. A., Natural  
511 Attenuation and Anaerobic Benzene Detoxification Processes at a Chlorobenzene-  
512 Contaminated Industrial Site Inferred from Field Investigations and Microcosm Studies.  
513 *Environ Sci Technol* **2018**, *52*, (1), 22-31.

- 514 9. Anderson, R. T.; Lovley, D. R., Anaerobic bioremediation of benzene under sulfate-  
515 reducing conditions in a petroleum-contaminated aquifer. *Environ Sci Technol* **2000**, *34*,  
516 2261-2266.
- 517 10. Geyer, R.; Peacock, A. D.; Miltner, A.; Richnow, H. H.; White, D. C.; Sublette, K. L.;  
518 Kästner, M., In situ assessment of biodegradation potential using biotrap amended with  
519 <sup>13</sup>C-labeled benzene or toluene. *Environ Sci Technol* **2005**, *39*, 4983-4989.
- 520 11. Fischer, A.; Theuerkorn, K.; Stelzer, N.; Gehre, M.; Thullner, M.; Richnow, H. H.,  
521 Applicability of stable isotope probing fractionation analysis for the characterization of  
522 benzene biodegradation in a BTEX-contaminated aquifer. *Environ Sci Technol* **2007**, *40*,  
523 3689-3696.
- 524 12. Kasai, Y.; Takahata, Y.; Manefield, M.; Watanabe, K., RNA-based stable isotope probing  
525 and isolation of anaerobic benzene-degrading bacteria from gasoline-contaminated  
526 groundwater. *Appl Environ Microbiol* **2006**, *72*, (5), 3586-92.
- 527 13. Liou, J. S.; Derito, C. M.; Madsen, E. L., Field-based and laboratory stable isotope probing  
528 surveys of the identities of both aerobic and anaerobic benzene-metabolizing  
529 microorganisms in freshwater sediment. *Environ Microbiol* **2008**, *10*, (8), 1964-77.
- 530 14. (ATSDR), A. f. T. S. a. D. R., Toxicology profile for benzene. In Services, U. S. D. o. H. a.  
531 H., Ed. Atlanta, GA, 2007.
- 532 15. Kunapuli, U.; Lueders, T.; Meckenstock, R. U., The use of stable isotope probing to  
533 identify key iron-reducing microorganisms involved in anaerobic benzene degradation.  
534 *ISME J* **2007**, *1*, (7), 643-53.
- 535 16. van der Zaan, B. M.; Saia, F. T.; Stams, A. J.; Plugge, C. M.; de Vos, W. M.; Smidt, H.;  
536 Langenhoff, A. A.; Gerritse, J., Anaerobic benzene degradation under denitrifying  
537 conditions: Peptococcaceae as dominant benzene degraders and evidence for a syntrophic  
538 process. *Environ Microbiol* **2012**, *14*, (5), 1171-81.
- 539 17. Noguchi, M.; Kurisu, F.; Kasuga, I.; Furumai, H., Time-Resolved DNA Stable Isotope  
540 Probing Links Desulfobacterales- and Coriobacteriaceae-Related Bacteria to Anaerobic  
541 Degradation of Benzene under Methanogenic Conditions. *Microbes and Environments*  
542 **2014**, *29*, (2), 191-199.
- 543 18. Dong, X.; Droge, J.; von Toerne, C.; Marozava, S.; McHardy, A. C.; Meckenstock, R. U.,  
544 Reconstructing metabolic pathways of a member of the genus *Pelotomaculum* suggesting  
545 its potential to oxidize benzene to carbon dioxide with direct reduction of sulfate. *FEMS*  
546 *Microbiol Ecol* **2017**, *93*, (3).
- 547 19. Atashgahi, S.; Hornung, B.; van der Waals, M. J.; da Rocha, U. N.; Hugenholtz, F.; Nijse,  
548 B.; Molenaar, D.; van Spanning, R.; Stams, A. J. M.; Gerritse, J.; Smidt, H., A benzene-  
549 degrading nitrate-reducing microbial consortium displays aerobic and anaerobic benzene  
550 degradation pathways. *Sci Rep* **2018**, *8*, (1), 4490.
- 551 20. Luo, F.; Devine, C. E.; Edwards, E. A., Cultivating microbial dark matter in benzene-  
552 degrading methanogenic consortia. *Environ Microbiol* **2016**, *18*, (9), 2923-36.
- 553 21. Luo, F.; Gitiafroz, R.; Devine, C. E.; Gong, Y.; Hug, L. A.; Raskin, L.; Edwards, E. A.,  
554 Metatranscriptome of an anaerobic benzene-degrading, nitrate-reducing enrichment culture  
555 reveals involvement of carboxylation in benzene ring activation. *Appl Environ Microbiol*  
556 **2014**, *80*, (14), 4095-107.

- 557 22. Abu Laban, N.; Selesi, D.; Rattei, T.; Tischler, P.; Meckenstock, R. U., Identification of  
558 enzymes involved in anaerobic benzene degradation by a strictly anaerobic iron-reducing  
559 enrichment culture. *Environ Microbiol* **2010**, *12*, (10), 2783-96.
- 560 23. Musat, F.; Widdel, F., Anaerobic degradation of benzene by a marine sulfate-reducing  
561 enrichment culture, and cell hybridization of the dominant phylotype. *Environ Microbiol*  
562 **2008**, *10*, (1), 10-9.
- 563 24. Phelps, C. D.; Kerkhof, L. J.; Young, L. Y., Molecular characterization of a sulfate-  
564 reducing consortium which mineralizes benzene. *FEMS Microbiol Ecol* **1998**, *27*, 269-279.
- 565 25. Ulrich, A. C.; Edwards, E. A., Physiological and molecular characterization of anaerobic  
566 benzene-degrading mixed cultures. *Environ Microbiol* **2003**, *5*, (2), 92-102.
- 567 26. Zhang, T.; Bain, T. S.; Nevin, K. P.; Barlett, M. A.; Lovley, D. R., Anaerobic benzene  
568 oxidation by *Geobacter* species. *Appl Environ Microbiol* **2012**, *78*, (23), 8304-10.
- 569 27. Nales, M.; Butler, B. J.; Edwards, E. A., Anaerobic Benzene Biodegradation: A  
570 Microcosm Survey. *Bioremediation Journal* **1998**, *2*, (2), 125-144.
- 571 28. Da Silva, M. L.; Alvarez, P. J., Assessment of anaerobic benzene degradation potential  
572 using 16S rRNA gene-targeted real-time PCR. *Environ Microbiol* **2007**, *9*, (1), 72-80.
- 573 29. Devine, C. E. Identification of key organisms, genes and pathways in benzene-degrading  
574 methanogenic cultures -<http://hdl.handle.net/1807/68915>. University of Toronto, 2013.
- 575 30. Sakai, N.; Kurisu, F.; Yagi, O.; Nakajima, F.; Yamamoto, K., Identification of putative  
576 benzene-degrading bacteria in methanogenic enrichment cultures. *J Biosci Bioeng* **2009**,  
577 *108*, (6), 501-7.
- 578 31. Luo, F. Characterization of the microbial community composition and benzene activation  
579 mechanisms in anaerobic benzene-degrading enrichment cultures. University of Toronto,  
580 Toronto, 2016.
- 581 32. Wei, Y.; Thomson, N. R.; Aravena, R.; Marchesi, M.; Barker, J. F.; Madsen, E. L.; Kolhatkar, R.;  
582 Buscheck, T.; Hunkeler, D.; Derito, C. M., Infiltration of sulfate to enhance sulfate-reducing  
583 biodegradation of petroleum hydrocarbons. *Ground Water Monit Remediat* **2018**, *38*, (4),  
584 73-87.
- 585 33. van der Waals, M. J.; Atashgahi, S.; da Rocha, U. N.; van der Zaan, B. M.; Smidt, H.;  
586 Gerritse, J., Benzene degradation in a denitrifying biofilm reactor: activity and microbial  
587 community composition. *Appl Microbiol Biotechnol* **2017**, *101*, (12), 5175-5188.
- 588 34. Gitiafroz, R. Microorganisms and metabolic pathways involved in anaerobic benzene  
589 biodegradation under nitrate-reducing conditions. University of Toronto, 2012.
- 590 35. Magnuson, E. Characterization of the microbial community and activity of nitrate-  
591 reducing, benzene-degrading enrichment cultures. University of Toronto, 2017.
- 592 36. Cherry, J. A.; Barker, J. F.; Feenstra, S.; Gillham, R. W.; Mackay, D. M.; Smyth, D. J. A.,  
593 The Borden Site for Groundwater Contamination Experiments: 1978-1995. In  
594 *Groundwater and Subsurface Remediation*, Kobus, H.; Barczewski, B.; Koschitzky, H. P.,  
595 Eds. Springer: 1996.
- 596 37. MacFarlane, D. S.; Cherry, J. A.; Gillham, R. W.; Sudicky, E. A., Migration of  
597 contaminants in groundwater at a landfill: A case study: 1. Groundwater flow and plume  
598 delineation. *Journal of Hydrology* **1983**, *63*, 1-29.
- 599 38. Nicholson, R. V.; Cherry, J. A.; Reardon, E. J., Migration of contaminants in groundwater  
600 at a landfill: A case study 6. Hydrogeochemistry. *J Hydrology* **1983**, *63*, 131-176.

- 601 39. Middeldorp, P. J. M.; van Aalst, M. A.; Rijnaarts, H. H. M.; Stams, F. J. M.; de Kreuk, H.  
602 F.; Schraa, G.; Bosma, T. N. P., Stimulation of reductive dechlorination for *in situ*  
603 bioremediation of a soil contaminated with chlorinated ethenes. *Wat Sci Tech* **1998**, *37*, (8),  
604 105-110.
- 605 40. Burland, S. M.; Edwards, E. A., Anaerobic benzene biodegradation linked to nitrate  
606 reduction. *Appl Environ Microbiol* **1999**, *65*, (2), 529-533.
- 607 41. Zhang, T.; Tremblay, P. L.; Chaurasia, A. K.; Smith, J. A.; Bain, T. S.; Lovley, D. R.,  
608 Anaerobic benzene oxidation via phenol in *Geobacter metallireducens*. *Appl Environ*  
609 *Microbiol* **2013**, *79*, (24), 7800-6.
- 610 42. Tian, R.; Ning, D.; He, Z.; Zhang, P.; Spencer, S. J.; Gao, S.; Shi, W.; Wu, L.; Zhang, Y.;  
611 Yang, Y.; Adams, B. G.; Rocha, A. M.; Detienne, B. L.; Lowe, K. A.; Joyner, D. C.;  
612 Klingeman, D. M.; Arkin, A. P.; Fields, M. W.; Hazen, T. C.; Stahl, D. A.; Alm, E. J.;  
613 Zhou, J., Small and mighty: adaptation of superphylum Patescibacteria to groundwater  
614 environment drives their genome simplicity. *Microbiome* **2020**, *8*, (1), 51.
- 615 43. Beam, J. P.; Becraft, E. D.; Brown, J. M.; Schulz, F.; Jarett, J. K.; Bezuidt, O.; Poulton, N.  
616 J.; Clark, K.; Dunfield, P. F.; Ravin, N. V.; Spear, J. R.; Hedlund, B. P.; Kormas, K. A.;  
617 Sievert, S. M.; Elshahed, M. S.; Barton, H. A.; Stott, M. B.; Eisen, J. A.; Moser, D. P.;  
618 Onstott, T. C.; Woyke, T.; Stepanauskas, R., Ancestral Absence of Electron Transport  
619 Chains in Patescibacteria and DPANN. *Frontiers in Microbiology* **2020**, *11*, (1848).
- 620 44. Dong, X.; Greening, C.; Bruls, T.; Conrad, R.; Guo, K.; Blaskowski, S.; Kaschani, F.;  
621 Kaiser, M.; Laban, N. A.; Meckenstock, R. U., Fermentative Spirochaetes mediate  
622 necromass recycling in anoxic hydrocarbon-contaminated habitats. *ISME J* **2018**, *12*, (8),  
623 2039-2050.
- 624 45. Sperfeld, M.; Diekert, G.; Studenik, S., Anaerobic aromatic compound degradation in  
625 *Sulfuritalea hydrogenivorans* sk43H. *FEMS Microbiology Ecology* **2018**, *95*, (1).
- 626 46. Langenhoff, A. A. M.; Richnow, H.; Gerritse, J., Benzene Degradation at a Site Amended  
627 with Nitrate or Chlorate. *Bioremediation Journal* **2009**, *13*, (4), 180-187.
- 628 47. National Research Council (NRC) *In situ bioremediation: When does it work?*; National  
629 Academy Press: Washington, DC, 1993.
- 630 48. da Silva, M. L. B.; Alvarez, P. J. J., Bioaugmentation. In *Handbook of Hydrocarbon and*  
631 *Lipid Microbiology*, 2010; pp 4531-4544.
- 632 49. Edwards, E. A.; Grbić-Galić, D., Complete Mineralization of Benzene by Aquifer  
633 Microorganisms under Strictly Anaerobic Conditions. *Appl Environ Microbiol* **1992**, *58*,  
634 (8), 2663-2666.
- 635 50. Parisi, V. A.; Brubaker, G. R.; Zenker, M. J.; Prince, R. C.; Gieg, L. M.; Da Silva, M. L.;  
636 Alvarez, P. J.; Suflita, J. M., Field metabolomics and laboratory assessments of anaerobic  
637 intrinsic bioremediation of hydrocarbons at a petroleum-contaminated site. *Microb*  
638 *Biotechnol* **2009**, *2*, (2), 202-12.
- 639 51. Sherry, A.; Grant, R. J.; Aitken, C. M.; Jones, D. M.; Head, I. M.; Gray, N. D., Volatile  
640 hydrocarbons inhibit methanogenic crude oil degradation. *Front Microbiol* **2014**, *5*, 131.
- 641 52. Menon, P.; Voordouw, G., Impact of light oil toxicity on sulfide production by acetate-  
642 oxidizing, sulfate-reducing bacteria. *International Biodeterioration & Biodegradation*  
643 **2018**, *126*, 208-215.

- 644 53. Molenda, O.; Puentes Jacome, L. A.; Cao, X.; Nesbo, C. L.; Tang, S.; Morson, N.; Patron,  
645 J.; Lomheim, L.; Wishart, D. S.; Edwards, E. A., Insights into origins and function of the  
646 unexplored majority of the reductive dehalogenase gene family as a result of genome  
647 assembly and ortholog group classification. *Environ Sci Process Impacts* **2020**, *22*, (3),  
648 663-678.
- 649 54. Stroo, H. F.; Leeson, A.; Ward, C. H., *Bioaugmentation for Groundwater Bioremediation*.  
650 Springer-Verlag New York: 2013.
- 651 55. Metsalu, T.; Vilo, J., ClustVis: a web tool for visualizing clustering of multivariate data  
652 using Principal Component Analysis and heatmap. *Nucleic Acids Res* **2015**, *43*, (W1),  
653 W566-70.

654

655

656

657

658 TOC Art and FIGURES follow



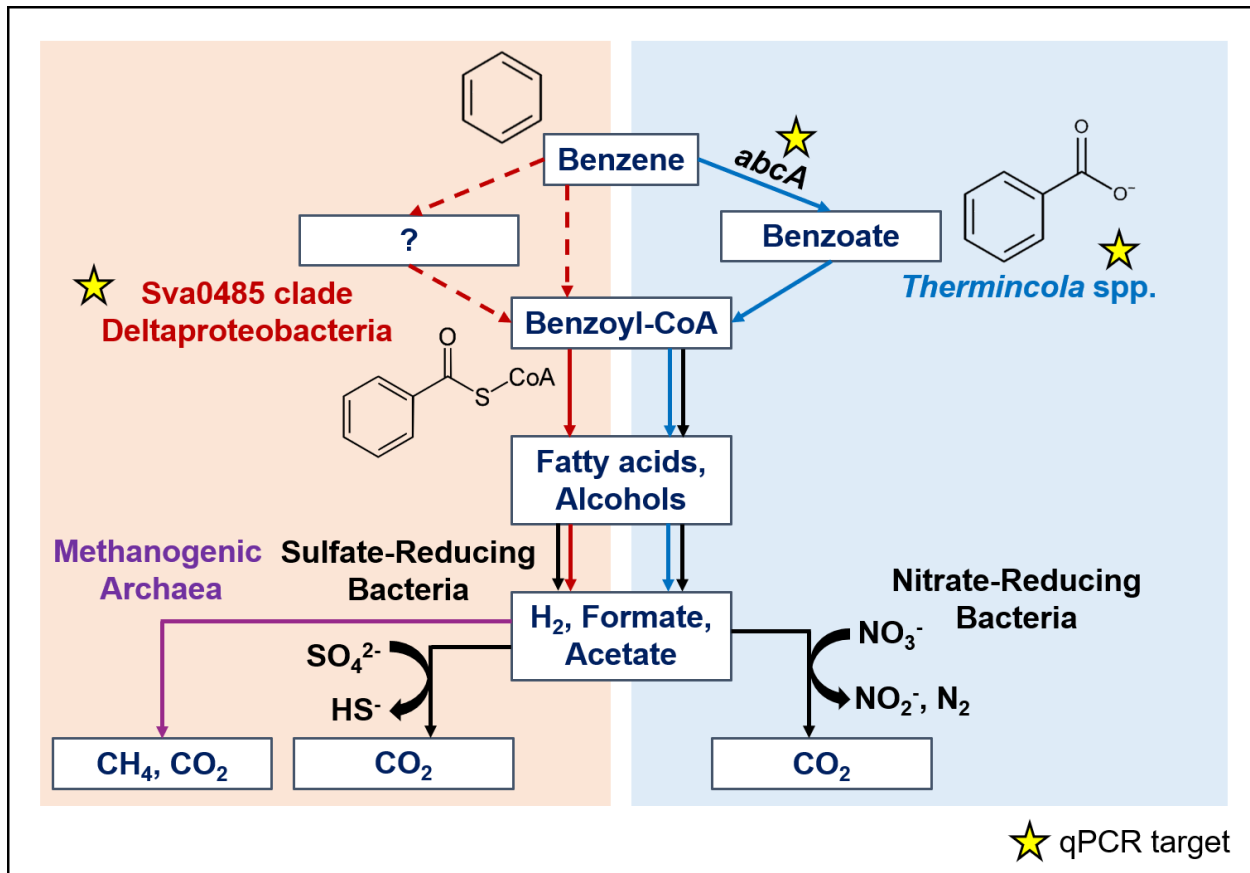

TOC image

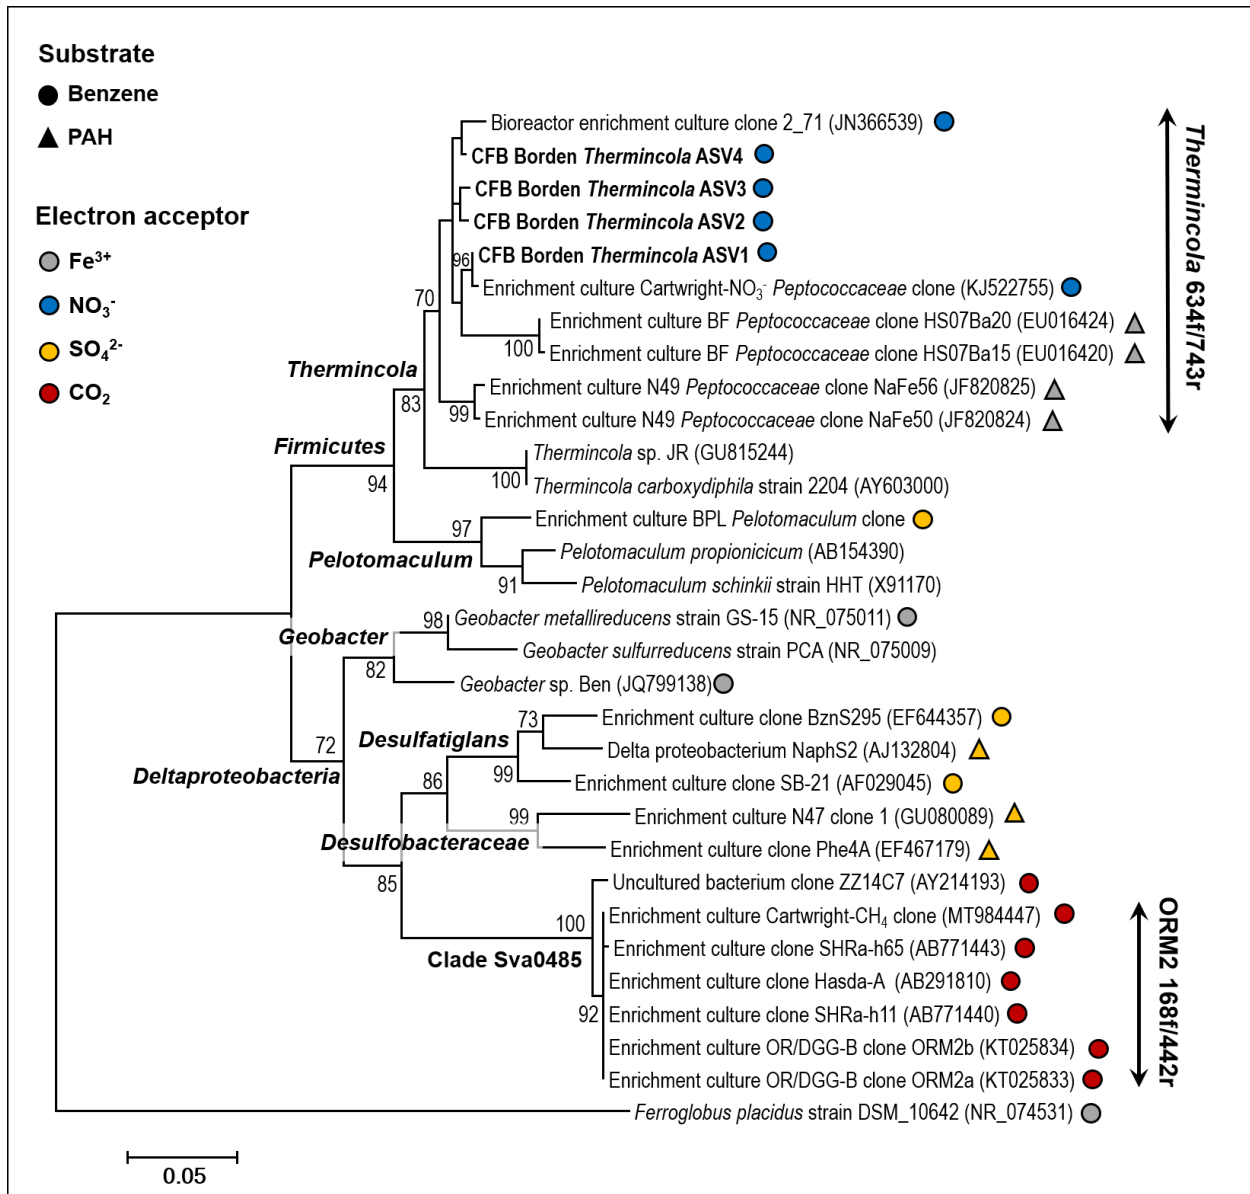

**Figure 1.** Maximum likelihood consensus tree showing the affiliation of near-complete 16S rRNA genes (1231 bp) belonging to anaerobic benzene and polycyclic aromatic hydrocarbon (PAH)-degrading microorganisms, and select reference strains. A description of how the final consensus tree was constructed is provided in Supporting Information (Text S1). Additionally, the specificity of the *Thermincola* and ORM2 qPCR primer pairs used in this study is illustrated.

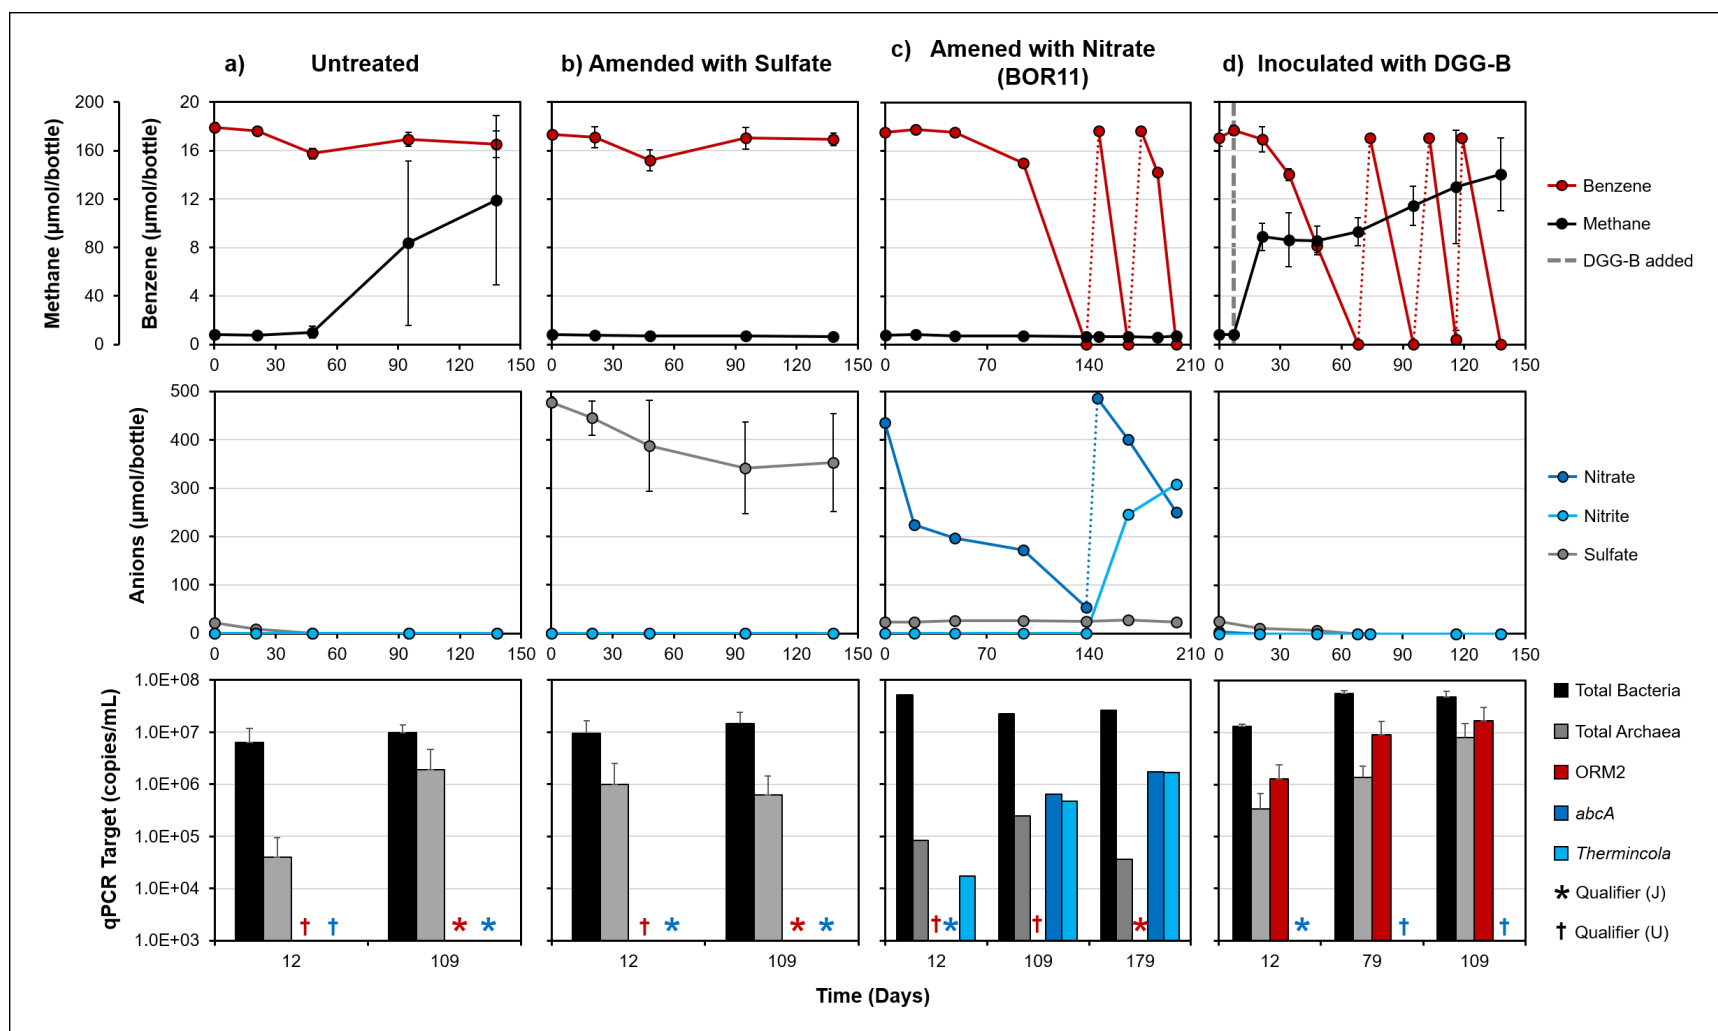

**Figure 2.** Benzene (top panels) and anion (center panels) degradation profiles of active bottles that were a) left untreated, b) amended with sulfate, c) amended with nitrate, or d) inoculated with 2.5% v/v DGG-B culture. Electron donor refeeding events are marked with dotted lines. The bottom panels summarize the abundance of target 16S rRNA gene copies and *abcA* enriched in each treatment. qPCR targets below quantifiable limits ( $< 10^3$  copies/mL) or below detection are designated by J and U qualifiers, respectively. Most results shown are the average of triplicate replicates

(error bars =  $\pm$  standard deviation). One replicate is shown for nitrate amended bottles; data for all replicates are shown in Figure S3. Data for bottles amended with both DGG-B and sulfate are shown in Figure S4.

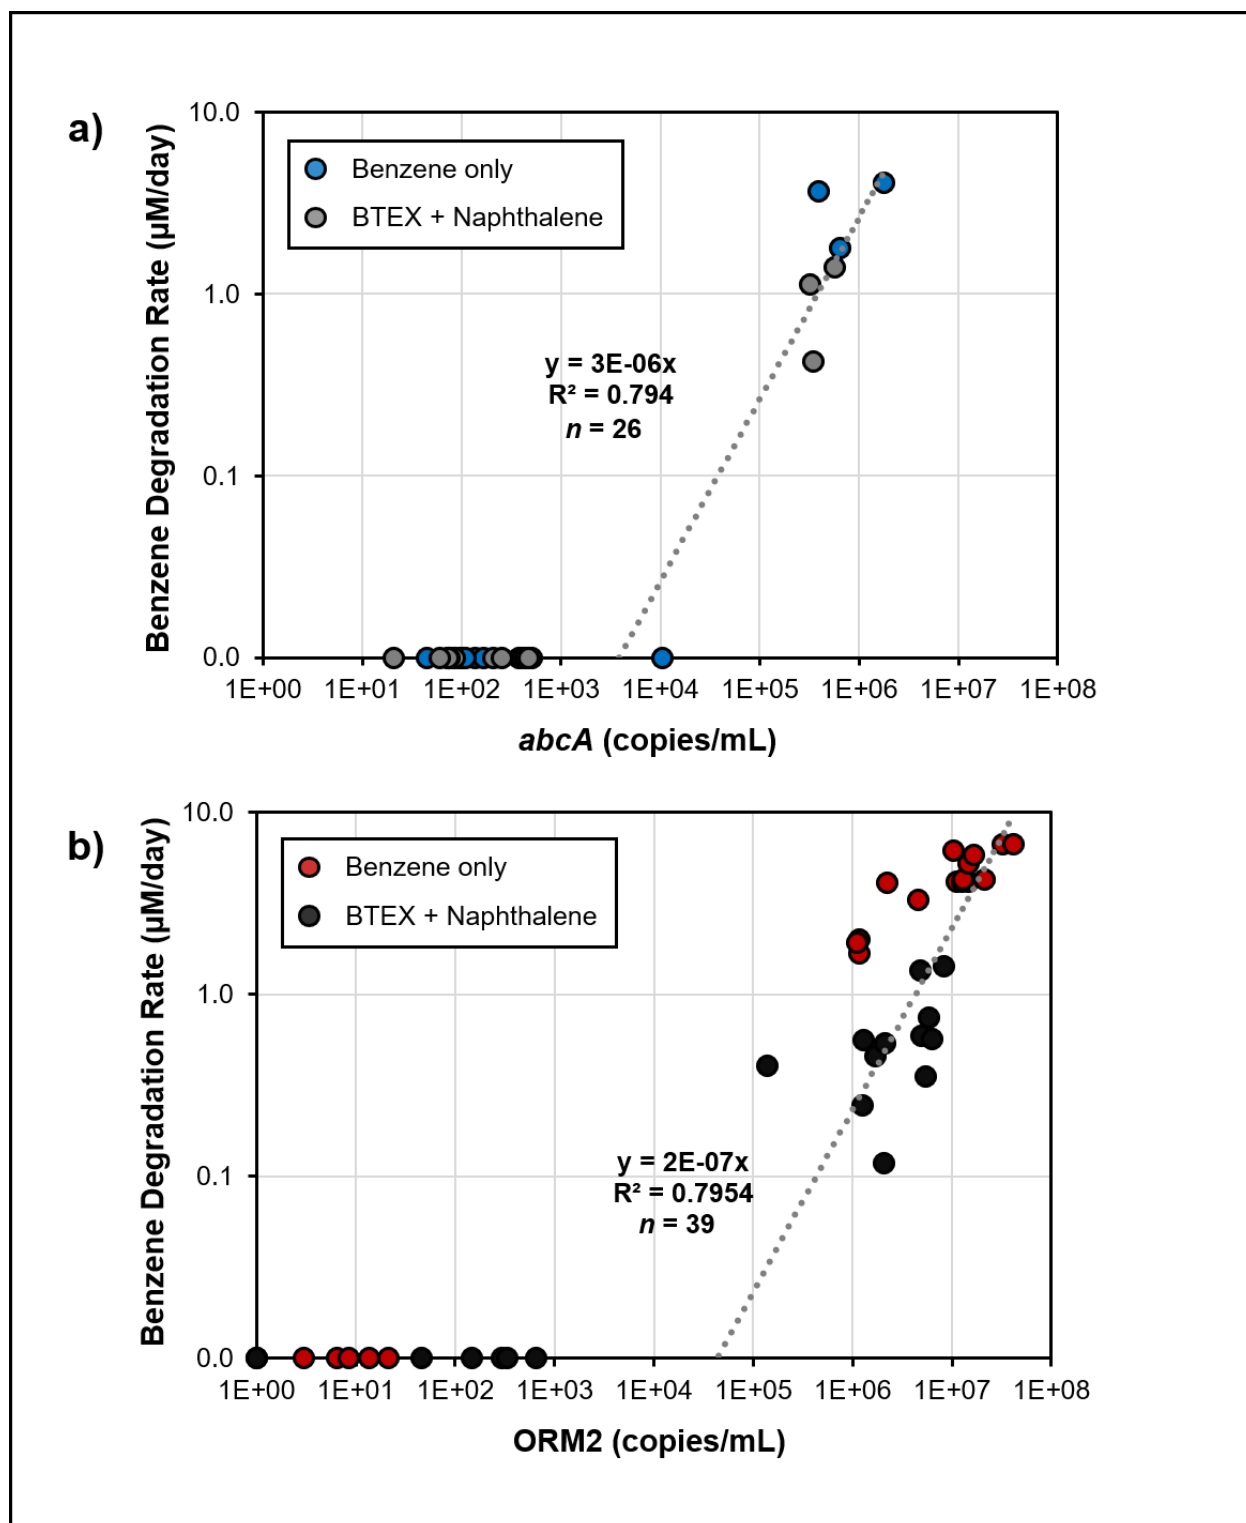

**Figure 3.** qPCR data showing correlations between concentrations of a) *abcA* or b) Sva0485 clade Deltaproteobacteria and rates of anaerobic benzene degradation. Samples are grouped by substrate. Day 12 gDNA samples were omitted from correlation analyses as rate data were inaccurate so early in the study.

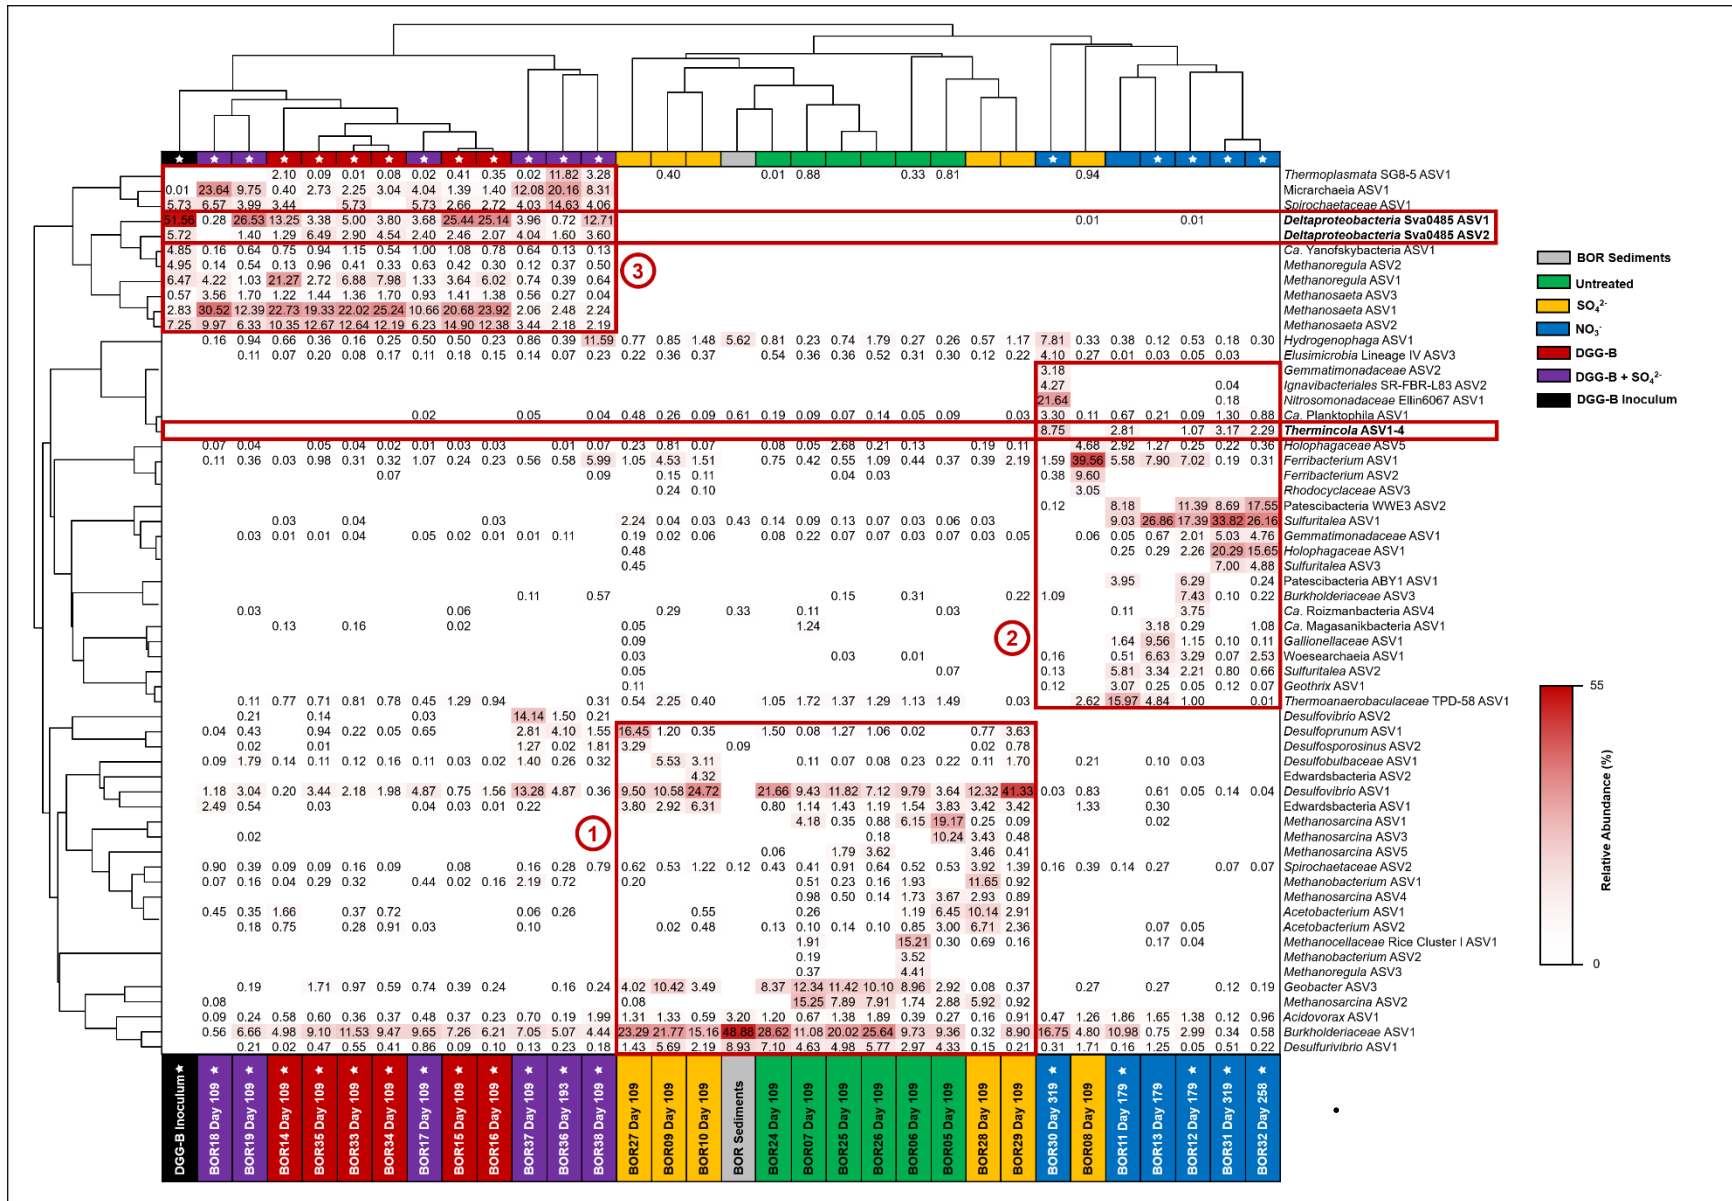

**Figure 4 (above):** Microbial community analysis of dominant ASVs ( $\geq 3\%$  in one or more sample) in experimental bottles at select timepoints, relative to homogenized CFB Borden sediments and the DGG-B inoculum. Samples marked with stars (★) indicate active anaerobic benzene degradation at the time of sampling. Rows and columns were clustered in ClustVis<sup>55</sup> using correlation distance and average linkages. The inset heat map designates the relative abundance of each ASV, where darker shades of red indicate higher relative abundances. The relative abundance of minor ASVs is provided in Table S7. Predicted benzene-degrading bacteria and microbial clusters of interest are highlighted in red boxes. Finally, four *Thermincola* ASVs have been collapsed and included in this figure to highlight their enrichment in active nitrate-reducing, benzene-degrading bottles.
